# Supplementary material for: Denatured protein stabilized drug nanoparticles: tunable drug state and penetration across the intestinal barrier
Source: Royal Society of Chemistry journal article supplement (doi:10.1039/c6tb02577c), 2016-12-29
Supplement: c6tb02577c1.pdf [file c6tb02577c1.pdf]

## Supplementary Information

### Denatured Protein Stabilized Drug Nanoparticles: Tunable Drug State and Penetration across the Intestinal Barrier

Wei He, <sup>#, a</sup> Yiao Wang, <sup>#, a</sup> Yaqi Lv, <sup>a</sup> Qingqing Xiao, <sup>a</sup> Ling Ye, <sup>b</sup> Bo Cai, <sup>a</sup> Chao Qin, <sup>a</sup> Xiaopeng  
Han, <sup>a</sup> Ting Cai, <sup>a</sup> Lifang Yin<sup>\*, a</sup>

<sup>a</sup> Department of Pharmaceutics, School of Pharmacy, China Pharmaceutical University, Nanjing  
210009, PR China

<sup>b</sup> School of Pharmaceutical Sciences, Southern Medical University, Guangzhou 510515, PR  
China

**# He W and Wang YA contributed equally to this work.**

\*Corresponding author: Yin, LF

Department of Pharmaceutics

School of Pharmacy

China Pharmaceutical University

Nanjing, 210009, PR China

Tel/Fax: +862583271018

E-mail: lifangyin\_@163.com

**List of content:**

1. Mean particle size and PI of STP-Ns in apical and basolateral medium (Table S1) – P. 3
2. Formulation optimization (Figure S1) – P. 4
3. 2D structure of protein-drug complex (Figure S2) – P. 5
4. In vitro dissolution profiles (Figure S3) – P. 6
5. CLSM images (Figure S4) – P. 7
6. Uptake of STP-Ns in Caco-2 cells pre-incubated with inhibitors (Figure S5) – P. 8

**Table S1**

|                    | <b>Particle size (nm)</b> | <b>PI</b>     |
|--------------------|---------------------------|---------------|
| Apical medium      | 157.60                    | 0.269 ± 0.019 |
| Basolateral medium | 158.20                    | 0.338 ± 0.023 |

**Table S1.** Mean particle size and PI of STP-Ns in apical and basolateral medium after incubation with Transwell filter grown Caco-2 cell monolayer at 37 °C for 2 h.

Figure S1

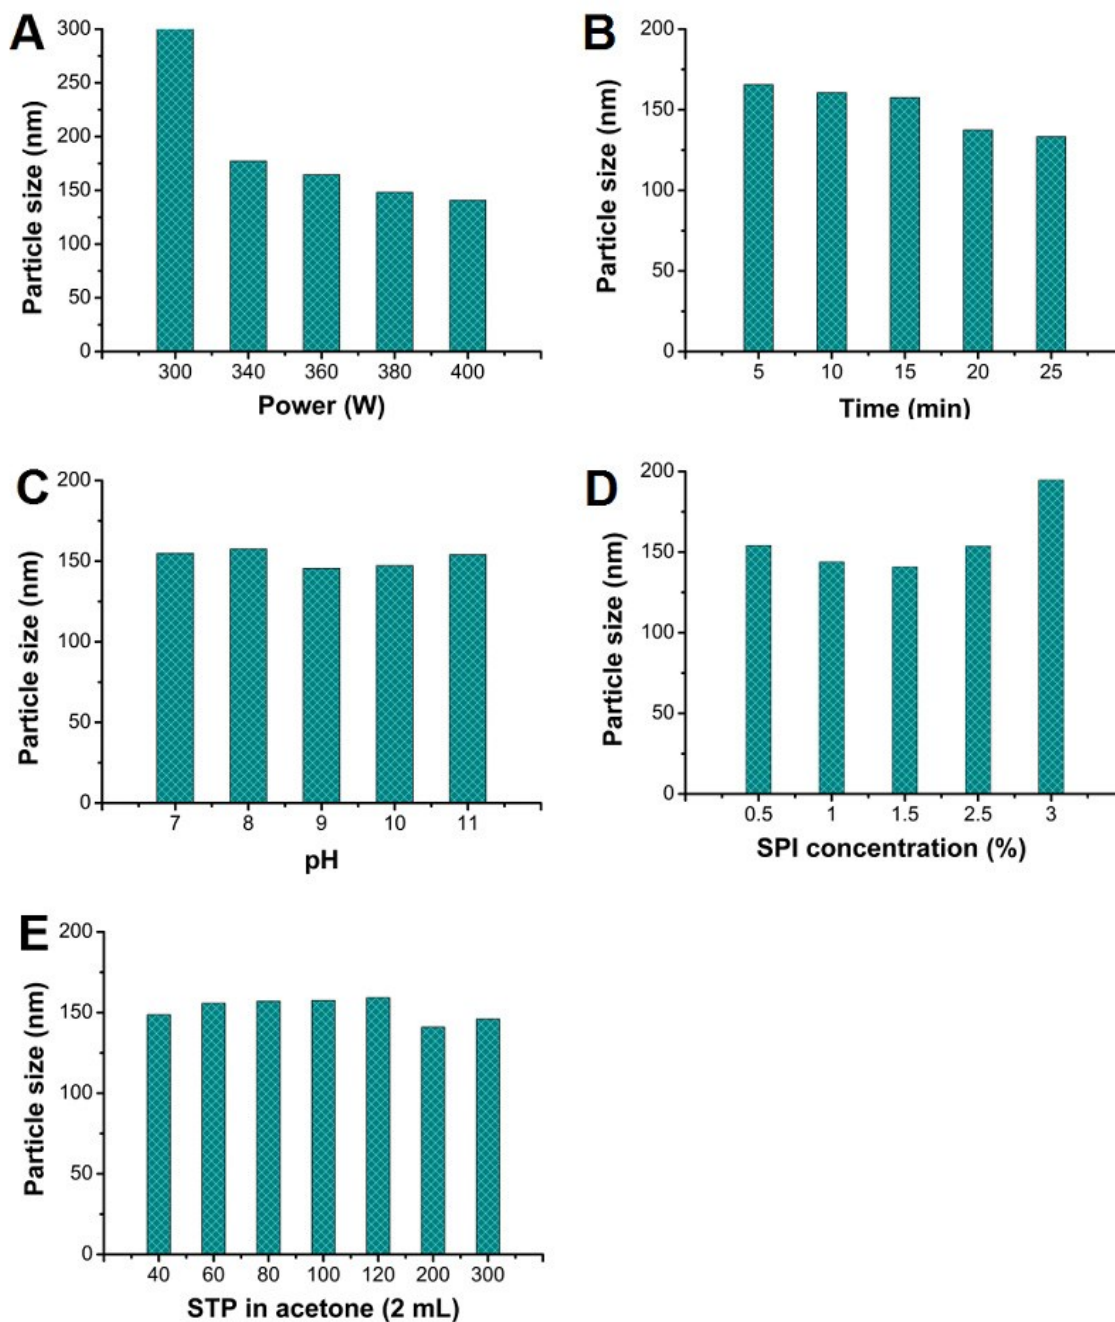

**Figure S1.** Effects of (A) powder input, (B) duration of ultrasonic treatment, (C) pH, (D) SPI concentration and (E) STP concentration in acetone on the particle size of the STP-Ns. (A, B, C, E) The SPI concentration under aqueous conditions was 1 mg/mL, and (A, B, C, D) the STP concentration was 80 mg/mL in 2 mL of acetone.



**Figure S3**

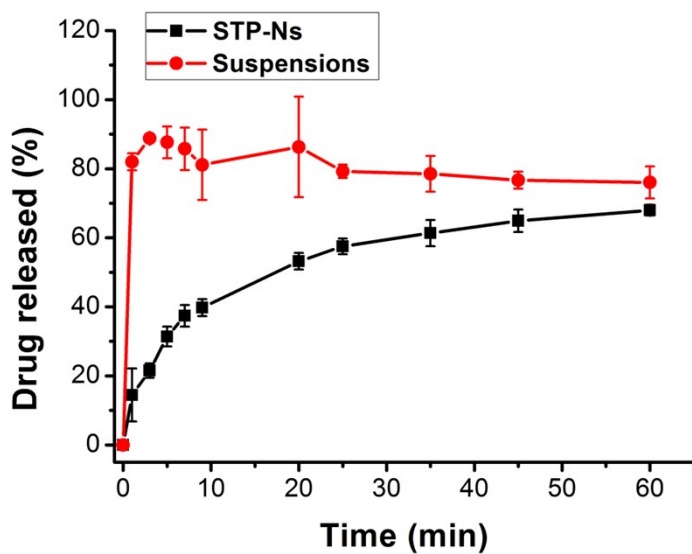

**Figure S3.** In vitro dissolution profiles of STP from the STP-Ns and suspensions in pH 6.8 PBS containing 1% Tween-80 at 37 °C ( $n = 3$ ). The control is suspension formulation preparing by dispersing STP raw particles into 2.5% (w/w) HPMC solution.

**Figure S4**

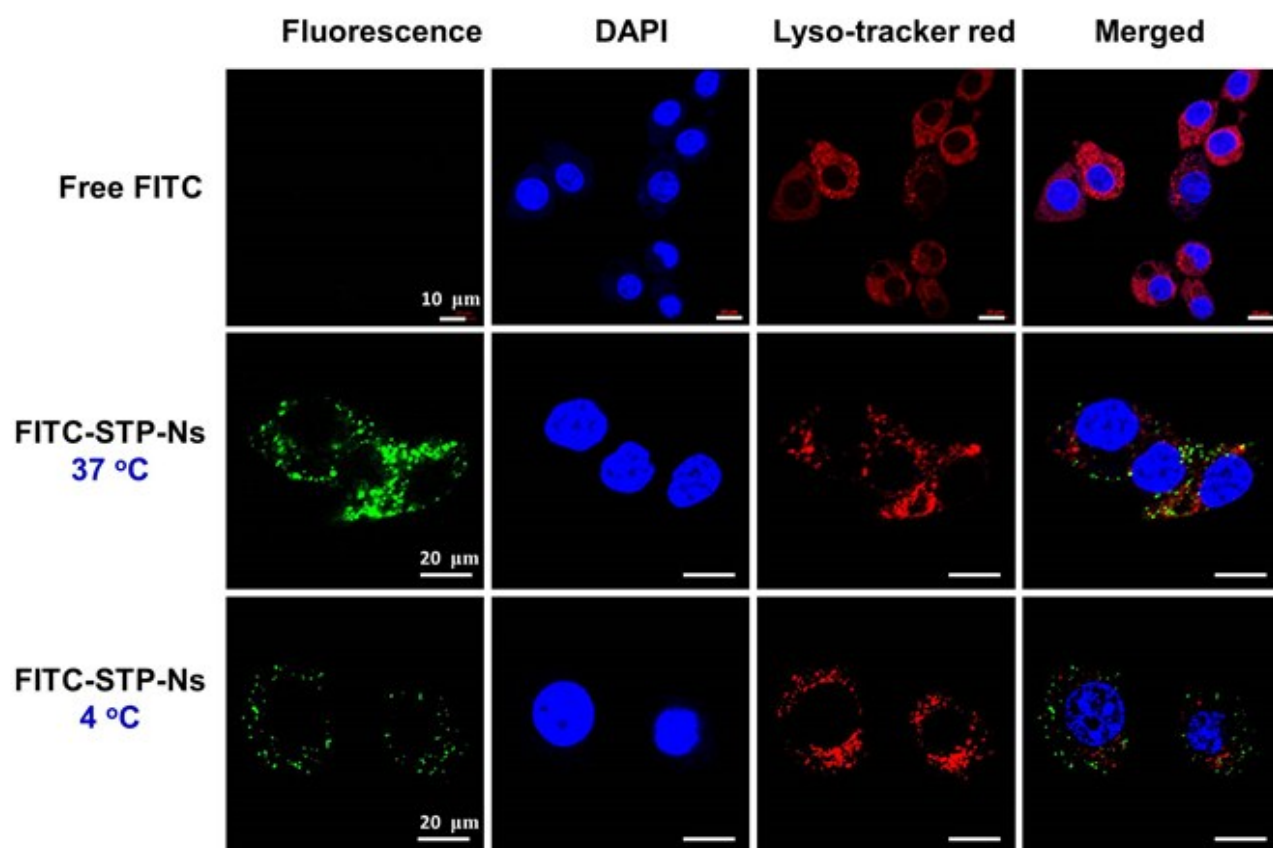

**Figure S4.** CLSM images of Caco-2 cells cultured with FITC-STP-Ns for 1 h at 37 °C or 4 °C, using free FITC as control. The nuclei (blue area) and lysosomes (red area) were stained with DAPI and Lyso-tracker red, respectively.

**Figure S5**

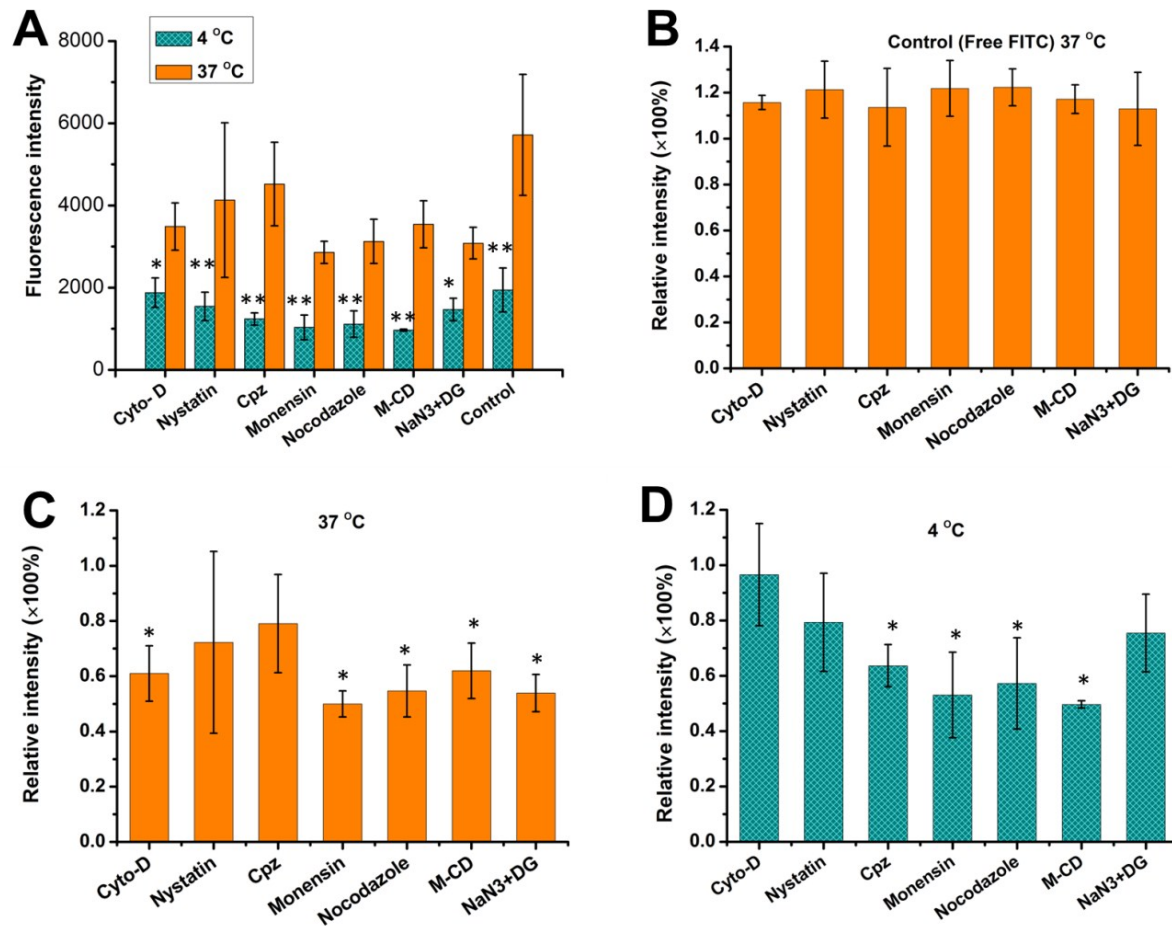

**Figure S5.** Fluorescence intensity of Caco-2 cells incubated with inhibitors for 30 min before administration of (A) FITC-STP-Ns or at 37 °C or 4 °C and relative intensity with respect to control at (C) 37 °C or (D) 4 °C ( $n = 5$ ). (B) The control was free FITC. The inhibitors, Cyto-D, nystatin, Cpz, monensin, nocodazole, M-CD, and NaN<sub>3</sub>+DG, block macropinocytosis, caveolin internalization, microtubule-related internalization, clathrin-mediated endocytosis, microtubule-related internalization, lysosome-mediated internalization, cholesterol-dependent internalization, and energy-dependent mechanisms of uptake, respectively. \*,  $p < 0.05$  and \*\*,  $p < 0.01$ .
